# Supplementary material
Source: PubMed Central journal article supplement (PMC2656274)
Supplement: blood-2008-06-162164_1.pdf [file blood-2008-06-162164_1.pdf]

## Primer Sequences

### **ChIP-PCR**

5'HOTAIRM1 forward 5' TTGGAGTGCTGGAGCGAA 3'  
5'HOTAIRM1 reverse 5' TCCTCATTGCCATGCTAATGACGAGAGG 3'  
3'HOTAIRM1 forward 5' GAACCCATCAACAGCTGGGAGATTAATCAA 3'  
3'HOTAIRM1 reverse 5' GAGGCAGAATTGGACAGTCTAAGATTTGGGCCA 3'  
TUBA1B-3 forward 5' AAGGTTGGCATCAACTACCA 3'  
TUBA1B-3 reverse 5' GACTTTACTTTGAGATATGATGG 3'  
RNU6A(dp) forward 5' CATATACGATACAAGGCTGTTAGAG 3'  
RNU6A(dp) reverse 5' CATATACGATACAAGGCTGTTAGAG 3'

### **Multiplex RT-PCR (for polysomal fractions and cDNA panels)**

HOTAIRM1(246bp) forward 5' GGAGCGAAGAAGAGCAAA 3'  
HOTAIRM1(246bp) reverse 5' GTTTCAAACACCCACATTTTC 3'  
HOTAIRM1(386bp) forward 5' CCGTCTAGGTGACGCGCAGTCG 3'  
HOTAIRM1(386bp) reverse 5' CCAGTCTCCAGGTCAATAACTAAGTTATCAACAATTCAT 3'  
HOXA1 forward 5' AACACAGGGAAAGTTGGAGAG 3'  
HOXA1 reverse 5' CTTTGGGTAAGAAGTCCCAG 3'  
TUBA1B forward 5' GATGACTCCTTCAACACCT 3'  
TUBA1B reverse 5' GCGAACTTCATCAATGACTG 3'

### **Real-time RT-PCR**

HOTAIRM1 forward 5' CCCACCGTTCAATGAAAG 3'  
HOTAIRM1 reverse 5' GTTTCAAACACCCACATTTTC 3'  
CEBPE forward 5' CAGACAGCCATGCACCTG 3'  
CEBPE reverse 5' CTGCCTTCTTGCCCTTGTG 3'  
HOXA1 forward 5' CCCAAAACAGGGAAAGTTGGA 3'  
HOXA1 reverse 5' GCGTCAGGTACTTGTGAAGTG 3'  
HOXA4 forward 5' CATGTCAGCGCCGTTAACCC 3'  
HOXA4 reverse 5' GGTCTTTCTTCCACTTCATCCTCCG 3'  
HOXA5 forward 5' CACATAAGTCATGACAACATAGGC 3'  
HOXA5 reverse 5' GCTATTTCAATCCTCCTTCTGC 3'  
HOXA9 forward 5' CGATCCCAATAACCCAGCAG 3'  
HOXA9 reverse 5' AACAGAACTCTTTCTCCAGTTCC 3'  
HOXA10 forward 5' AATGTGTCAAGGCAATCCAAAGG 3'  
HOXA10 reverse 5' AGAACTCCTTCTCCAGCTCCA 3'  
HOXA11 forward 5' CGGCAGCAGAGGAGAAAGA 3'  
HOXA11 reverse 5' CGGATCTGGTACTTGGTATAGGG 3'  
HMBS forward 5' GAAATCATTGCTATGTCCACC 3'  
HMBS reverse 5' AGGTCCACTTCATTCTTCTC 3'  
PPIA forward 5' TACTATTAGCCATGGTCAACCC 3'  
PPIA reverse 5' TCTGCAAACAGCTCAAAGGA 3'  
RPS6 forward 5' CTCTGAAGAAGCAGCGTACC 3'  
RPS6 reverse 5' TTCTCCTTAGCCTCCTTCATTCTC 3'  
TUBA1B forward *TUBA1B forward (in multiplex RT-PCR)*  
TUBA1B reverse *TUBA1B reverse (in multiplex RT-PCR)*

### **Northern blot probe amplification**

5' forward *HOTAIRM1(386bp) forward (see "Multiplex RT-PCR")*  
5' reverse 5' TTGATTAATCTCCCAGCTGTTGATGGGTTTC 3'  
3' forward 5' GAACCCATCAACAGCTGGGAGATTAATCAA 3'  
3' reverse 5' GAGGCAGAATTGGACAGTCTAAGATTTGGGCCA 3'

### **HOTAIRM1-specific RACE-PCR primers**

5'-RACE-HOTAIRM1 *HOTAIRM1(386bp) forward (see "Multiplex RT-PCR")*  
3'-RACE-HOTAIRM1 5' reverse *(see "Northern blot probe amplification")*
